# Supplementary material
Source: publisher figshare collection journal article supplement (https://karger.figshare.com/ndownloader/files/17470016)
Supplement: Supplementary file 1 [file 17470016]

Self-administered questionnaires distributed among 10,087 subjects in April 2010

**First phase**

8,691 participants returned the completed questionnaires

**Second phase**

Self-administered questionnaires distributed among 9652 subject in mid‐May 2010

1606 questionnaires were excluded due to not participating in first phase, not writing down the identification number

6239 completed questionnaires were returned

**Final analyses**

4,633 questionnaires in the second phase were matched with their corresponding questionnaires in the first phase in September 2010

Supplementary file 1. Participants flow chart
